# Supplementary material
Source: PubMed Central journal article supplement (PMC4364217)
Supplement: pnas.201419388SI.pdf [file pnas.201419388SI.pdf]

# Supporting Information

Schuhmacher et al. 10.1073/pnas.1419388112

## SI Materials and Methods

**Plasmids.** Genes encoding for the proteins used in this study were amplified from genomic DNAs of *B. subtilis* PY79, *G. thermodenitrificans* NG80-2, and *S. putrefaciens* CN-32 by PCR using Q5 High-Fidelity DNA polymerase (New England Biolabs) according to the manufacturer's manual. Primers were designed according to the following gene annotations: *B. subtilis* PY79: U712\_08620 (*flhG*), U712\_08570 (*fliM*), and U712\_08575 (*fliY*); *G. thermodenitrificans* NG80-2: GTNG\_1094 (*flhG*), GTNG\_1083 (*fliM*), GTNG\_1084 (*fliY*); GTNG\_1073 (*fliG*), and GTNG\_2544 (*minC*); and *S. putrefaciens* CN-32: Sputcn32\_2560 (*flhG*), Sputcn32\_2569 (*fliM<sub>1</sub>*), Sputcn32\_2568 (*fliN<sub>1</sub>*), Sputcn32\_3479 (*fliM<sub>2</sub>*), and Sputcn32\_3480 (*fliN<sub>2</sub>*). A protocol for isolating *S. putrefaciens* CN-32 genomic DNA was described previously (1). A (His)<sub>6</sub> tag was encoded in either the forward or reverse primer. The PCR fragment was cloned into pET24d(+) or pET16b vectors (Novagen) via commonly used restriction sites (i.e., *NcoI/PciI/BamHI/XhoI*). Enzymes used in this study were purchased from New England Biolabs, Biozym Scientific GmbH, and Fermentas. Mutations within FlhG were generated using QuikChange II site-directed mutagenesis (Agilent). The FlhG-YFP fusion was made by cloning the last 500 coding base pairs of *flhG* (*ylxH* gene) into the plasmid pSG1164 (2). Constructions of markerless in-frame deletion or integration mutants in *S. putrefaciens* CN-32 based on the suicide vector pNPTS138-R6KT were performed as described previously (3, 4). Amino acid substitutions in FlhG were introduced by appropriate codon modifications in *flhG* and reintegration into a  $\Delta flhG$  mutant. Production and stability of the FlhG variants were confirmed by Western immunoblotting. To construct FliM<sub>1</sub>- $\Delta$ Ntr, the sequence corresponding to amino acid positions 2–28 was deleted in *fliM<sub>1</sub>* in the background strains. Western immunoblotting and fluorescence microscopy confirmed the stable production of the mCherry-labeled proteins. To enable fluorescence labeling of FlgE<sub>2</sub>, an ACC-to-TGC codon substitution was introduced into *flgE<sub>2</sub>*, yielding a Thr242Cys substitution (FlgE<sub>2</sub>-Cys). The modified gene was reintroduced into the corresponding  $\Delta flgE<sub>2</sub>$  mutant of *S. putrefaciens* CN-32. The substitution did not affect the motility of the resulting mutant as determined by soft-agar assays (Fig. S6E) and light microscopy.

**Strains, Growth Conditions, and Media.** All strains used and constructed in this study are summarized in Table S2. In *B. subtilis*, FlhG-YFP fusion protein is expressed from the original genetic locus, and a xylose-inducible promoter controls downstream genes. For colocalization studies, a strain expressing FliM-CFP from the ectopic *amyE* locus (a kind gift of Daniel B. Kearns, Indiana University, Bloomington, IN) was transformed with chromosomal DNA of the FlhG-YFP strain. Functionality of FliM-CFP fusion has been demonstrated in the literature (5). The functionality of FlhG was verified intrinsically by coexpression with FliM-CFP, because defective FlhG would have led immediately to aberrant FliM foci, which were not observed (5). *E. coli* strains DH5 $\alpha$   $\lambda$ pir, BL-21, and WM3064, *B. subtilis* strain PY 79, and *S. putrefaciens* CN-32 were grown routinely in lysogeny broth (LB) medium at 37 °C and 30 °C, respectively. The medium for the 2,6-diaminopimelic acid (DAP)-auxotroph *E. coli* WM3064 was supplemented with DAP at a final concentration of 300  $\mu$ M. To solidify media, LB agar was prepared using 1.5% (wt/vol) agar. When required, media were supplemented with 100  $\mu$ g/mL ampicillin, 50  $\mu$ g/mL kanamycin, and/or 10% (wt/vol) sucrose. To prepare agarose pads for fluorescence microscopy, PBS (137 mM NaCl, 2.7 mM KCl,

10 mM Na<sub>2</sub>HPO<sub>4</sub>, 1.8 mM KH<sub>2</sub>PO<sub>4</sub>, pH 7.4) was solidified by adding 1% (wt/vol) agarose. *B. subtilis* strains were plated onto LB-agar plates containing 0.5% xylose and the respective antibiotics. The strains used in this study are listed in Table S2.

**Protein Production and Purification.** For gene expression, *E. coli* BL21 (DE3) were grown in LB medium under autoinduction conditions [D(+)-lactose-monohydrate, 1.75% (wt/vol)] supplemented with the respective antibiotics (50  $\mu$ g/mL kanamycin or 100  $\mu$ g/mL ampicillin) at 30 °C for ~16 h under constant shaking (150 rpm). Cells were harvested by centrifugation (4,000 rpm/3,500  $\times$  g for 20 min at 4 °C), suspended in lysis buffer [20 mM Hepes-Na (pH 8.0), 250 mM NaCl, 40 mM imidazole, 20 mM MgCl<sub>2</sub>, and 20 mM KCl] and subsequently lysed using the M-110L Microfluidizer (Microfluidics). After centrifugation (23,000 rpm/63,000  $\times$  g for 20 min at 4 °C), the clarified lysate was applied to a 1-mL HisTrap FF column (GE Healthcare) equilibrated with 10 column volumes of lysis buffer. After washing with 70 mL lysis buffer, proteins were eluted using 15 mL elution buffer (lysis buffer containing 500 mM imidazole). Elution fractions containing protein were concentrated using Amicon Ultracel-10K (Millipore) and subsequently applied to SEC (HiLoad 26/600 Superdex 200 pg, GE Healthcare) equilibrated in SEC buffer [20 mM of Hepes-Na (pH 7.5), 200 mM NaCl, 20 mM MgCl<sub>2</sub>, and 20 mM KCl]. Fractions were analyzed using SDS/PAGE. Protein containing fractions were pooled and concentrated according to experimental requirements. Concentration was determined by a spectrophotometer (NanoDrop Lite; Thermo Scientific). FliM and FliY were coexpressed and copurified via a (His)<sub>6</sub> tag at the C terminus of FliM. A trimeric complex containing FliM, FliY, and FlhG was copurified using two His tags at the C terminus of FliM and the N terminus of FlhG.

**Crystallization of GtFlhG.** All crystallization experiments were carried out by the sitting-drop method in SWISSCI MRC two-well crystallization plates at room temperature. The reservoir volume was 50  $\mu$ L, and the drop volume was 1  $\mu$ L, with a 1:1 mixture of protein and crystallization solution. Crystals of apo-GtFlhG were obtained from a 20.0 mg/mL solution after ~3 wk in 0.1 M Hepes (pH 7.5), 10% (wt/vol) PEG 8000, 0.1 urea. Crystals of the dimeric state of FlhG were obtained from a 20.0 mg/mL solution of the GtFlhG D60A variant after ~3 wk in a buffer containing 0.1 M Hepes (pH 7.0) and 20% (wt/vol) PEG 6000. Before crystallization, FlhG-D60A was incubated with 4.4 mM ATP for 1 h on ice.

**Data Collection, Structure Determination, and Analysis.** Before data collection, crystals were flash-frozen in liquid nitrogen after a short incubation in a cryo-protecting solution that consisted of mother liquor supplemented with 20% (vol/vol) glycerol. Data collection was performed at the European Synchrotron Radiation Facility in Grenoble, France under cryogenic conditions beamlines: ID 23-2 (apo-state of FlhG) and ID 23-1 (dimeric state of FlhG). Data were recorded with a DECTRIS PILATUS 6M detector. Data were processed using iMosflm (6) and the CCP4-implemented program SCALA (7). The structure of apo-FlhG was solved by molecular replacement with CCP4-integrated PHASER (8) using EcMinD (PDB ID code: 3QL9) and monomeric FlhG (this study) as search models. Structures were built manually in COOT (9) and were refined using PHENIX refine (10). Figures were designed with PyMol ([www.pymol.org](http://www.pymol.org)).

**HDX Mass Spectroscopy.** HDX experiments were performed as described previously (11–13). Minor adjustments of the setup mainly concerned the HPLC pumps (isocratic: 1100 series; Agilent Technologies/Hewlett Packard; gradient: 1260 Infinity; Agilent Technologies) and the mass analyzer (Orbitrap Velos Pro; Thermo Scientific). Purified and concentrated *GtFlhG* and *GtFliY*, and the *GtFlhG*-*FliY* complex (200 pmol, 50  $\mu$ M) were diluted 10-fold into D<sub>2</sub>O-containing SEC buffer [20 mM Hepes (pH 7.5), 200 mM NaCl, 20 mM KCl, and 20 mM MgCl<sub>2</sub>] and were incubated at 37 °C to start H/D exchange. After 30 s the reaction was quenched by decreasing the temperature to 0 °C and adding one equivalent (50  $\mu$ L) of Quench buffer [400 mM KH<sub>2</sub>PO<sub>4</sub>/H<sub>3</sub>PO<sub>4</sub> (pH 2.2)]. The samples were injected immediately onto HPLC. Peptic peptides from the on-line digest were analyzed directly by mass spectrometry, and the deuterium content was calculated using HDX workbench (14). Relative deuterium incorporation was calculated based upon the centroids of the molecular ion isotope distribution extracted from the software. For adjustment, the 0% control was treated with H<sub>2</sub>O buffer. Complete exchange was defined as 90% of the possible incorporation and applied to all samples, because of dilution and re-exchange during the HPLC run.

**GST-Binding Assays.** GST pulldown assays were performed in PBS buffer at 4 °C. Purified GST-protein (i.e., GST-FlhG, GST-FliG) (1 nmol) was applied to 15  $\mu$ L glutathione Sepharose 4B (GE Healthcare) in small filter columns (MoBiTec) by incubation on a wheel for 15 min. Subsequently, 2 nmol of putative binding partners (i.e., FlhG, FliY, FliM) and 2.5 mM of appropriate nucleotides were added and incubated for 10 min at 4 °C on the wheel. After centrifugation [4,000 rpm (3,500  $\times$  g), for 1 min at 4 °C] the column was washed three times with PBS buffer. Proteins were eluted with 40  $\mu$ L of GSH buffer [50 mM Tris-HCl, 20 mM GSH (pH 7.5)] and analyzed by Coomassie-stained SDS/PAGE. Conditions for time-resolved GST pulldown assays were adjusted toward physiological temperature (37 °C) and carried out using SEC-buffer.

**Ni-NTA Affinity Binding Assays.** FlhG variants were investigated for their ability to bind FliM/FliY by Ni-NTA affinity pulldown assays from expression cultures. Expression culture of (His)<sub>6</sub>-tagged FlhG variants (100 mL) and untagged FliM/FliY coexpression were mixed, harvested, and lysed as stated (*Protein Production and Purification*). Ni-NTA agarose (300  $\mu$ L) (Qiagen) was added to the clarified lysate and incubated for 15 min on ice. After centrifugation (4,000 rpm/3,500  $\times$  g for 15 min at 4 °C), the lysate was discarded, and the loaded Ni-NTA agarose was washed three times with 500  $\mu$ L of lysis buffer and subsequently was centrifuged (4,000 rpm/3,500  $\times$  g for 5 min at 4 °C). Proteins were eluted with 300  $\mu$ L of elution buffer and were analyzed by Coomassie-stained SDS/PAGE.

**Fluorescence Microscopy.** *B. subtilis* cells were cultivated in LB medium at 37 °C to exponential growth phase (OD<sub>600</sub> 0.5) and were immobilized on coverslips by S7<sub>50</sub> medium containing agarose pads (1% wt/vol). Fluorescence microscopy was performed on a fully automated Leica SP 8 laser scanning microscope equipped with a 100 $\times$  HCX PL APO STED objective (NA 1.4), an argon ion laser source, and Leica HyD detectors. Images were analyzed using the Huygens (Scientific Volume Imaging) and LAS AF (Leica) software. Foci that were immobile within the resolution limit (250 nm) for more than 5 s were defined as static.

*Shewanella* strains were cultured to midexponential phase before imaging. Appropriately diluted cultures (2–5  $\mu$ L) were added on top of an agar pad to immobilize cells. A DMI6000 B fluorescence microscope (Leica) equipped with a HCX PL APO 100 $\times$ /1.4 differential interference contrast (DIC) objective was used to visualize single cells. Image acquisition and processing

were carried out using the VisiView Premier software (Visitron Systems GmbH) and ImageJ 1.47v software (National Institutes of Health) (15).

**Hydrolysis Assays.** The ATPase activity was investigated using an HPLC-based assay. FlhG, its D60A variant, and FliG were diluted to 20  $\mu$ M (1 nmol) and supplemented with 2 mM ATP (100 nmol) and 25  $\mu$ L of *E. coli* lipid vesicles. Hydrolysis assays were performed in SEC buffer at 37 °C with an incubation time of 1 h. Subsequent flash freezing in liquid nitrogen stopped the hydrolysis reaction. HPLC measurements were performed with an Agilent 1100 Series HPLC system (Agilent Technologies) and a C18 column (EC 250/4.6 Nucleodur HTec 3  $\mu$ m; Macherey-Nagel). The samples were injected onto HPLC and run for 30 min with a buffer containing 50 mM KH<sub>2</sub>PO<sub>4</sub>, 50 mM K<sub>2</sub>HPO<sub>4</sub>, 10 mM TPAB, and 15% (vol/vol) acetonitrile at flow rate of 0.8 mL/min. ADP and ATP were detected by UV light at 260.8 nm and were quantified (by peak area) using ChemStation (B.04.03).

**Flotation Assays.** PE and PG were supplied by Avanti Polar Lipids. Lipids were mixed in ratio of 70% PE:30% PG, and the chloroform was evaporated under reduced pressure for 30 min. LUVs were prepared in assay buffer [100 mM phosphate, 750 mM NaCl, 10 mM MgCl<sub>2</sub>, 1.2 M sucrose (pH 7.5)] by extrusion (16). After 10 freeze-thaw cycles, lipids were passed 21 times through a 100-nm pore polycarbonate filter (Nuclepore) in a two-syringe extruder (Avanti Polar Lipids), resulting in LUVs. Proteins were mixed with 50  $\mu$ L of the LUV solution and were incubated for 20 min. Flotation gradient centrifugation was performed as described previously (17). Samples were mixed with 360  $\mu$ L of assay buffer containing 50% iodixanol, overlaid with 1.16 mL of assay buffer with 30% iodixanol, and finally overlaid by 450  $\mu$ L of assay buffer. After ultracentrifugation (Beckmann Coulter) for 3 h at 45,000 rpm (217,000  $\times$  g) in a swing-out rotor (MLS 50; Beckmann Coulter), the gradient was collected in three fractions (600  $\mu$ L top, 800  $\mu$ L middle, 600  $\mu$ L bottom) and analyzed by SDS/PAGE after TCA precipitation. Briefly, the separated fractions were treated with 100  $\mu$ L TCA and were incubated overnight at –20 °C. After centrifugation (Heraeus Fresco 17; Thermo Scientific) for 20 min at 13,000 rpm (16,200  $\times$  g) and 4 °C, the pellets were washed twice with 500  $\mu$ L chilled acetone. Before SDS/PAGE analysis, the remaining acetone was evaporated (2 min at 95 °C).

**Flagellar Staining.** Staining of flagellar filaments was performed as described earlier (18). Ten microliters of an exponentially growing culture were spotted onto a microscopy slide and stained before visualization. Microscopy and image acquisition were carried out with a Leica DMI6000B microscope equipped with an HCX PL APO 100 $\times$ /1.4 DIC objective.

**Immunoblot Analysis.** To determine production and stability of proteins, lysates from exponentially growing LB cultures were obtained for Western blot analyses. Subsequent to harvesting by centrifugation, cells corresponding to an OD<sub>600</sub> of 10 were resuspended in sample buffer (19), heated at 99 °C for 5 min, and stored at –20 °C. Ten microliters of sample were resolved by SDS/PAGE using 11% polyacrylamide gels. Subsequently, proteins were transferred to PVDF Immobilon-P membrane (Millipore) through semidry transfer. To detect the fusion proteins, polyclonal antibodies raised against mCherry (Biovision Life Sciences), GFP (Roche GmbH) or purified SpFlhG (in dilutions of 1:10,000, 1:5,000, and 1:1,000, respectively) were used. Secondary anti-rabbit IgG-HRP antibody was used at a dilution of 1:20,000 to detect mCherry and She-FlhG antibodies. For Roche GFP antibodies, a secondary anti-mouse IgG-alkaline phosphatase antibody was used at a dilution of 1:15,000. Signals were detected using the SuperSignal West Pico Chemiluminescent

Substrate (Thermo Scientific) or CDP-Star chemiluminescent substrate (Roche Diagnostics) and were documented using the CCD System Fusion SL4 (PEQLAB Biotechnologie).

**Motility Assays.** Spreading of *S. putrefaciens* CN-32 wild-type or mutant cell cultures was monitored by light microscopy or on soft-agar plates using previously established protocols (4, 20). Soft-agar plates had an agar concentration of 0.25% (wt/vol); 3  $\mu$ L of an exponentially growing planktonic culture of the appropriate strain was spotted for a motility assay. The plates were incubated for an adequate amount of time at 30 °C, and the radial extension of the cultures was documented. To compare the radial extension of different mutant strains with that of wild-type *S. putrefaciens* CN-32, the appropriate cultures always were spotted onto the same soft-agar plate.

**Fluorescence Staining of FlgE<sub>2</sub>-cys.** Fluorescence coupling of FlgE<sub>2</sub>-cys, as a marker for intact secondary lateral flagella, was carried out essentially according to a previously published protocol (21, 22) with several modifications. One milliliter of a culture of the appropriate strain at 0.5 OD<sub>600</sub> was pelleted and resuspended in 50  $\mu$ L PBS buffer containing 5  $\mu$ g/mL Alexa Fluor 488 C<sub>5</sub> maleimide

(Molecular Probes), followed by incubation for 5 min at room temperature. Subsequently, cells were pelleted again and resuspended in 500  $\mu$ L PBS. For fluorescence microscopy, 5  $\mu$ L of the suspension was put on top of an agarose pad.

**Transmission Electron Microscopy.** To prepare samples for electron microscopy according to the methods described in ref. 4, cells were grown to midexponential phase. Glutaraldehyde was added to a final concentration of 1.25% (vol/vol) to fix cells for 15 min before washing once with lactate medium (LM) (10 mM Hepes, pH 7.5; 200 mM NaCl; 0.02% yeast extract; 0.01% peptone; 15 mM lactate). After washing, cells were concentrated via centrifugation at 13,000 rpm. The resulting pellet was suspended in 50  $\mu$ L of medium, and 5  $\mu$ L of the cell suspension was applied to glow-discharged and carbon-coated copper grids (400 square mesh; Plano). The samples were washed immediately twice with ddH<sub>2</sub>O and were negatively stained with uranyl acetate (2%) for 20 s. Electron microscopy was performed on a JEOL 2100 TEM (JEOL Ltd.) equipped with a LaB<sub>6</sub> cathode and operated at 120 kV. To record images, a fast-scan 2  $\times$  2k camera F214 combined with the EM-Menu 4 software (TVIPS) was used.

1. Pospiech A, Neumann B (1995) A versatile quick-prep of genomic DNA from gram-positive bacteria. *Trends Genet* 11(6):217–218.
2. Lewis PJ, Marston AL (1999) GFP vectors for controlled expression and dual labelling of protein fusions in *Bacillus subtilis*. *Gene* 227(1):101–110.
3. Lassak J, Henche AL, Binnenkade L, Thormann KM (2010) ArcS, the cognate sensor kinase in an atypical Arc system of *Shewanella oneidensis* MR-1. *Appl Environ Microbiol* 76(10):3263–3274.
4. Bubendorfer S, et al. (2012) Specificity of motor components in the dual flagellar system of *Shewanella putrefaciens* CN-32. *Mol Microbiol* 83(2):335–350.
5. Guttenplan SB, Shaw S, Kearns DB (2013) The cell biology of peritrichous flagella in *Bacillus subtilis*. *Mol Microbiol* 87(1):211–229.
6. Battice TGG, Kontogiannis L, Johnson O, Powell HR, Leslie AGW (2011) iMOSFLM: A new graphical interface for diffraction-image processing with MOSFLM. *Acta Crystallogr D Biol Crystallogr* 67(Pt 4):271–281.
7. Winn MD, et al. (2011) Overview of the CCP4 suite and current developments. *Acta Crystallogr D Biol Crystallogr* 67(Pt 4):235–242.
8. McCoy AJ, et al. (2007) Phaser crystallographic software. *J Appl Cryst* 40(Pt 4):658–674.
9. Emsley P, Cowtan K (2004) Coot: Model-building tools for molecular graphics. *Acta Crystallogr D Biol Crystallogr* 60(Pt 12 Pt 1):2126–2132.
10. Adams PD, et al. (2010) PHENIX: A comprehensive Python-based system for macromolecular structure solution. *Acta Crystallogr D Biol Crystallogr* 66(Pt 2): 213–221.
11. Rist W, Jørgensen TJ, Roepstorff P, Bukau B, Mayer MP (2003) Mapping temperature-induced conformational changes in the *Escherichia coli* heat shock transcription factor sigma 32 by amide hydrogen exchange. *J Biol Chem* 278(51):51415–51421.
12. Stjepanovic G, et al. (2011) Lipids trigger a conformational switch that regulates signal recognition particle (SRP)-mediated protein targeting. *J Biol Chem* 286(26):23489–23497.
13. Kressler D, et al. (2012) Synchronizing nuclear import of ribosomal proteins with ribosome assembly. *Science* 338(6107):666–671.
14. Pascal BD, et al. (2012) HDX workbench: Software for the analysis of H/D exchange MS data. *J Am Soc Mass Spectrom* 23(9):1512–1521.
15. Schneider CA, Rasband WS, Eliceiri KW (2012) NIH Image to ImageJ: 25 years of image analysis. *Nat Methods* 9(7):671–675.
16. Hope MJ, Bally MB, Webb G, Cullis PR (1985) Production of large unilamellar vesicles by a rapid extrusion procedure: Characterization of size distribution, trapped volume and ability to maintain a membrane potential. *Biochim Biophys Acta* 812(1):55–65.
17. Parltz R, et al. (2007) *Escherichia coli* signal recognition particle receptor FtsY contains an essential and autonomous membrane-binding amphipathic helix. *J Biol Chem* 282(44):32176–32184.
18. Heimbrook ME, Wang WL, Campbell G (1989) Staining bacterial flagella easily. *J Clin Microbiol* 27(11):2612–2615.
19. Laemmli UK (1970) Cleavage of structural proteins during the assembly of the head of bacteriophage T4. *Nature* 227(5259):680–685.
20. Bubendorfer S, Koltai M, Rossmann F, Sourjik V, Thormann KM (2014) Secondary bacterial flagellar system improves bacterial spreading by increasing the directional persistence of swimming. *Proc Natl Acad Sci USA* 111(31):11485–11490.
21. Blair KM, Turner L, Winkelman JT, Berg HC, Kearns DB (2008) A molecular clutch disables flagella in the *Bacillus subtilis* biofilm. *Science* 320(5883):1636–1638.
22. Courtney CR, Cozy LM, Kearns DB (2012) Molecular characterization of the flagellar hook in *Bacillus subtilis*. *J Bacteriol* 194(17):4619–4629.

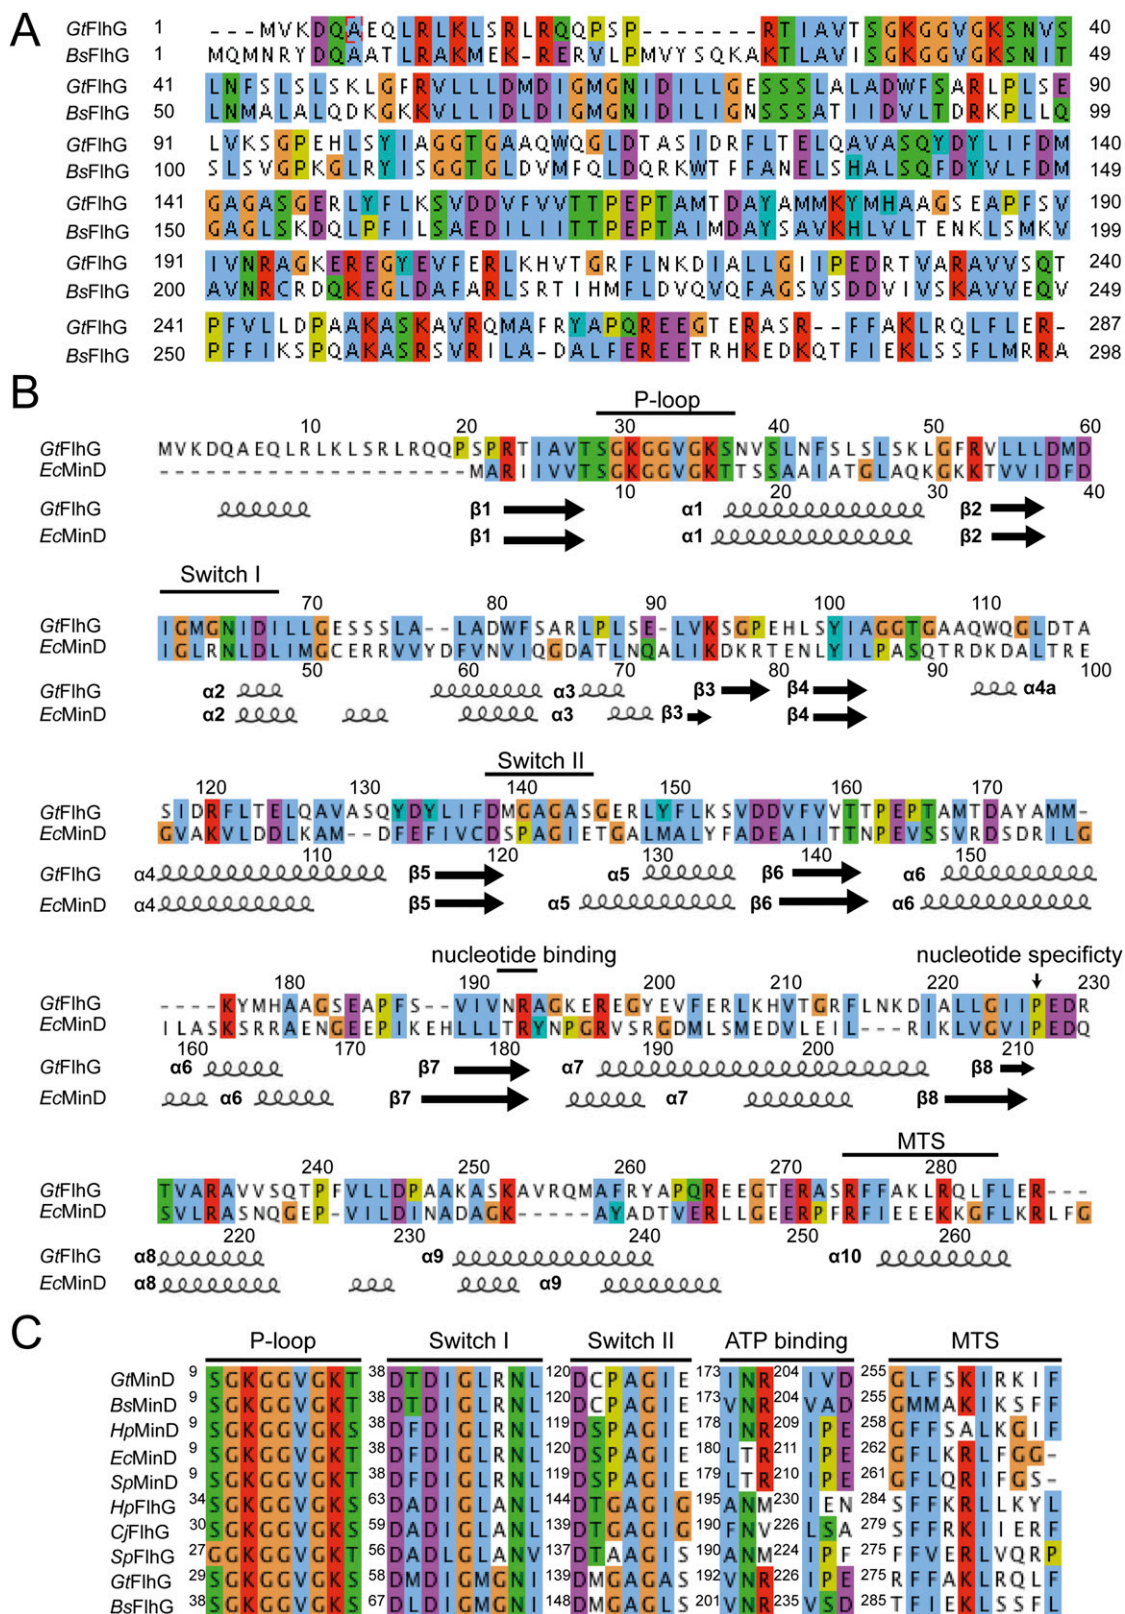

**Fig. S1.** Sequence and secondary structure alignments. (A) The color code indicates conservation and identity of amino acids between the FlhG homologs of *B. subtilis* and *G. thermodenitrificans*. (B) Alignment of GtFlhG and EcMinD shows the similarity of these ATPases. Secondary structure elements and important catalytic regions are indicated. *Ec*, *Escherichia coli*; *Gt*, *Geobacillus thermodenitrificans*. (C) FlhG and MinD share the catalytically important regions for ATP/magnesium binding and ATP hydrolysis: P-loop, Switch regions I and II, ATP-binding residues and a C-terminal, amphipathic helix. *Bs*, *Bacillus subtilis*; *Cj*, *Campylobacter jejuni*; *Ec*, *Escherichia coli*; *Gt*, *Geobacillus thermodenitrificans*; *Hp*, *Helicobacter pylori*; *Sp*, *Shewanella putrefaciens*.











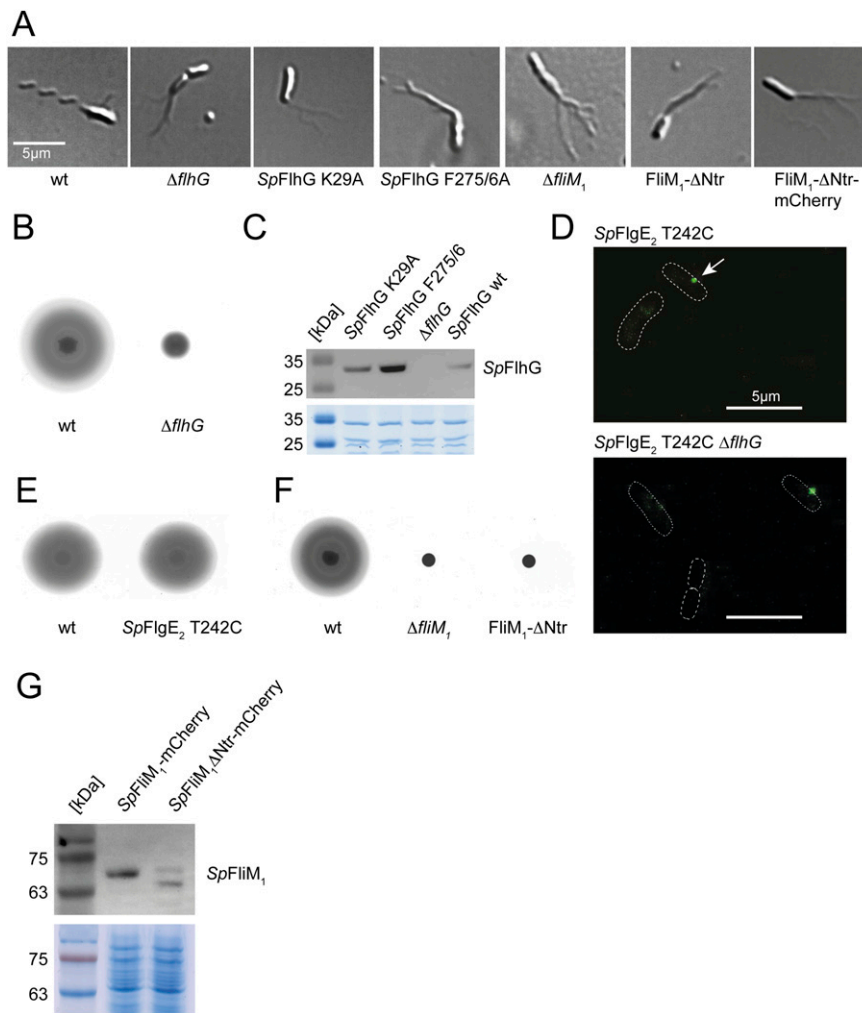

**Fig. S6.** Characteristics of FlhG from *S. putrefaciens*. (A) Flagella staining of various *flhG* and *fliM*<sub>1</sub> mutants in *S. putrefaciens* CN-32. Substitution mutants of SpFlhG affecting membrane targeting (SpFlhG F275/6A) and ATPase function (SpFlhG K29A) display a hyperflagellation state similar to that of the *flhG* deletion mutant. *S. putrefaciens* mutant strains lacking the Ntr of FliM<sub>1</sub> (FliM<sub>1</sub>- $\Delta$ Ntr and FliM<sub>1</sub>- $\Delta$ Ntr-mCherry) show hyperflagellation similar to that of a  $\Delta fliM_1$  strain. (B) A soft-agar assay demonstrates that *Shewanella*  $\Delta flhG$  mutants lack motility. (C) Western blot analysis shows the expression and stability of SpFlhG and its variants K29A and F275/276A. In the  $\Delta flhG$  strain of *S. putrefaciens*, no FlhG was observed. (D) Staining of the hook protein SpFlgE<sub>2</sub> of the secondary lateral flagellum was performed as described, and the cells were used for fluorescence microscopy. Arrows point at clusters of FlgE<sub>2</sub>, the hook protein of the lateral flagellar system, indicating the presence of a complete secondary flagellum. (E) A soft-agar assay demonstrates that the T242C substitution, which enables effective labeling, does not affect flagellar function. (F) Motility of *S. putrefaciens* (Left) and its  $\Delta fliM_1$  (Center) and *fliM*<sub>1</sub> $\Delta$ Ntr (Right) mutant strains was monitored on swimming plates (0.25% agarose) at 30 °C. (G) Expression and protein integrity of SpFliM<sub>1</sub>-mCherry and its N-terminal deletion variant SpFliM<sub>1</sub>- $\Delta$ Ntr-mCherry was verified by Western blot analysis.

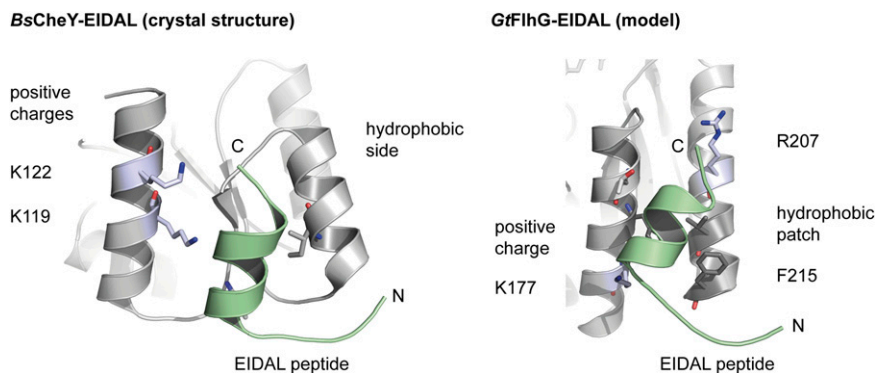

**Fig. S7.** Molecular mimicry. (Left) The interaction of *BsCheY* with the EIDAL motif of *BsFlhM* from *B. subtilis* (PDB ID code: 2B1J). Important residues and characteristics of the interaction interface are depicted. (Right) The EIDAL motif in an arbitrary placement at the *GtFlhY*-binding site of *GtFlhG*. Amino acid residues of *FlhG*, that are essential for binding of *FlhM/FlhY* as shown in this study, are highlighted. Note: The model of *FlhG* with the EIDAL peptide is intended to suggest size relationships rather than presenting a precise molecular model.

**Table S1. Data collection and refinement**

| Data collection                                         | <i>GtFlhG</i> -monomer                         | <i>GtFlhG</i> -dimer |
|---------------------------------------------------------|------------------------------------------------|----------------------|
| Space group                                             | P 2 <sub>1</sub> 2 <sub>1</sub> 2 <sub>1</sub> | P 2 <sub>1</sub>     |
| Cell dimensions                                         |                                                |                      |
| <i>a</i> , <i>b</i> , <i>c</i> , Å                      | 63.87                                          | 51.25                |
|                                                         | 89.36                                          | 72.56                |
|                                                         | 111.88                                         | 65.62                |
| α, β, γ, °                                              | 90.00                                          | 90.00                |
|                                                         | 90.00                                          | 93.73                |
|                                                         | 90.00                                          | 90.00                |
| Energy, keV                                             | 12.6616                                        |                      |
| Resolution, Å                                           | 51.96–2.80                                     | 41.8–1.90            |
|                                                         | (2.95–2.80)                                    | (2.00–1.90)          |
| <i>R</i> <sub>merge</sub>                               | 0.136 (0.47)*                                  | 0.058 (0.247)*       |
| <i>I</i> / <i>σ</i>                                     | 11.7 (5.2)                                     | 12.0 (5.8)           |
| Completeness, %                                         | 100 (100)                                      | 99.2 (99.4)          |
| Redundancy                                              | 5.1 (5.2)                                      | 3.9 (3.9)            |
| Refinement                                              |                                                |                      |
| Resolution, Å                                           | 47.4–2.80                                      | 29.84–1.90           |
| No. reflections                                         | 15916                                          | 36165                |
| <i>R</i> <sub>work</sub> / <i>R</i> <sub>free</sub> , % | 17.7/22.8                                      | 22.1/26.0            |
| No. atoms                                               |                                                |                      |
| Protein                                                 | 3,952                                          | 3,743                |
| Ligand                                                  | 0                                              | 38                   |
| Water                                                   | 57                                             | 246                  |
| Rmsd                                                    |                                                |                      |
| Bond lengths, Å                                         | 0.008                                          | 0.008                |
| Bond angles, °                                          | 1.228                                          | 1.229                |
| Ramachandran, %                                         |                                                |                      |
| Preferred                                               | 96.64                                          | 96.90                |
| Allowed                                                 | 3.12                                           | 2.69                 |
| Outliers                                                | 0.20                                           | 0.41                 |

\*Values in parentheses are for the highest-resolution shell.

**Table S2. Description of bacterial strains**

| Bacterial strain               | Relevant genotype or description                                                                                                                                                                                             | Source                                                                |
|--------------------------------|------------------------------------------------------------------------------------------------------------------------------------------------------------------------------------------------------------------------------|-----------------------------------------------------------------------|
| <i>Escherichia coli</i>        |                                                                                                                                                                                                                              |                                                                       |
| DH5 $\alpha$ $\lambda$ pir     | $\phi$ 80dlacZ $\Delta$ M15 $\Delta$ (lacZYA-argF)U169 recA1 hsdR17 deoR thi-I supE44<br>gyrA96 relA1/ $\lambda$ pir                                                                                                         | (1)                                                                   |
| WM3064                         | thrB1004 pro thi rpsL hsdS lacZ $\Delta$ M15 RP4 - 1360 $\Delta$ (araBAD) 567 $\Delta$ dapA<br>1341::[erm pir(wt)]                                                                                                           | W. Metcalf, University of Illinois<br>at Urbana-Champaign, Urbana, IL |
| <i>Shewanella putrefaciens</i> |                                                                                                                                                                                                                              |                                                                       |
| CN-32                          | CN-32, wild-type                                                                                                                                                                                                             | (2)                                                                   |
| S 2576                         | $\Delta$ flaAB <sub>2</sub> ; markerless deletion of lateral flagellin genes <i>flaA</i> <sub>2</sub> and <i>flaB</i> <sub>2</sub><br>(Sputcn32_3455–Sputcn32_3456)                                                          | (3)                                                                   |
| S 3133                         | $\Delta$ flhG, $\Delta$ Sputcn32_2560; markerless deletion of the MinD-like ATPase FlhG                                                                                                                                      | This study                                                            |
| S 3218                         | $\Delta$ flaAB <sub>2</sub> $\Delta$ flhG; markerless deletion of the <i>flhG</i> gene in the $\Delta$ flaAB <sub>2</sub> background                                                                                         | This study                                                            |
| S 3414                         | $\Delta$ flgE <sub>2</sub> , $\Delta$ Sputcn32_3465; markerless deletion of lateral flagellar hook protein                                                                                                                   | This study                                                            |
| S 3419                         | FlgE <sub>2</sub> -T242C, markerless insertion of <i>flgE</i> <sub>2</sub> with substituted threonine 242 to cysteine<br>into $\Delta$ flgE <sub>2</sub> ; used for fluorescence labeling of lateral flagellar hook proteins | This study                                                            |
| S 3470                         | $\Delta$ flaAB <sub>2</sub> $\Delta$ flhG; markerless deletion of <i>flhG</i> in the FlgE <sub>2</sub> -T242C background                                                                                                     | This study                                                            |
| S 3498                         | FliM <sub>1</sub> - $\Delta$ Ntr; markerless deletion of residues 2–28 of the polar motor protein FliM <sub>1</sub><br>(Sputcn32_2569)                                                                                       | This study                                                            |
| S 3523                         | FliM <sub>1</sub> - $\Delta$ Ntr-mCherry; markerless chromosomal fusion of FliM <sub>1</sub> - $\Delta$ Ntr to mCherry<br>(C-terminal)                                                                                       | This study                                                            |
| S 3334                         | FlhG_F275AF276A, markerless insertion of <i>flhG</i> with substituted phenylalanine<br>275 to alanine and phenylalanine 276 to alanine into $\Delta$ flhG; disables the function<br>of the membrane targeting sequence       | This study                                                            |
| S 3335                         | FlhG_K29A, markerless insertion of <i>flhG</i> with substituted lysine 29 to alanine into<br>$\Delta$ flhG; disables dimer formation and ATP hydrolysis                                                                      | This study                                                            |
| S 3481                         | <i>flhG</i> KI; markerless insertion of <i>flhG</i> into $\Delta$ flhG; complements mutation                                                                                                                                 | This study                                                            |
| S 3472                         | $\Delta$ fliN; markerless deletion of the polar C ring motor with protein FliN <sub>1</sub>                                                                                                                                  | This study                                                            |
| <i>Bacillus subtilis</i>       |                                                                                                                                                                                                                              |                                                                       |
| PY79                           | PY79; wild-type                                                                                                                                                                                                              | (4)                                                                   |
| Jss01                          | PY79 <i>flhG-yfp</i> (Cm <sup>R</sup> )                                                                                                                                                                                      | This study                                                            |
| Jss02                          | PY79 <i>flhG-yfp</i> (Cm <sup>R</sup> ) <i>amyE::fliM-cfp</i> (Spec <sup>R</sup> )                                                                                                                                           | This study                                                            |

1. Miller VL, Mekalanos JJ (1988) A novel suicide vector and its use in construction of insertion mutations: Osmoregulation of outer membrane proteins and virulence determinants in *Vibrio cholerae* requires *toxR*. *J Bacteriol* 170(6):2575–2583.
2. Fredrickson JK, et al. (1998) Biogenic iron mineralization accompanying the dissimilatory reduction of hydrous ferric oxide by a groundwater bacterium. *Geochim Cosmochim Acta* 62(19–20):3239–3257.
3. Bubendorfer S, Koltai M, Rossmann F, Sourjik V, Thormann KM (2014) Secondary bacterial flagellar system improves bacterial spreading by increasing the directional persistence of swimming. *Proc Natl Acad Sci USA* 111(31):11485–11490.
4. Zeigler DR, et al. (2008) The origins of 168, W23, and other *Bacillus subtilis* legacy strains. *J Bacteriol* 190(21):6983–6995.

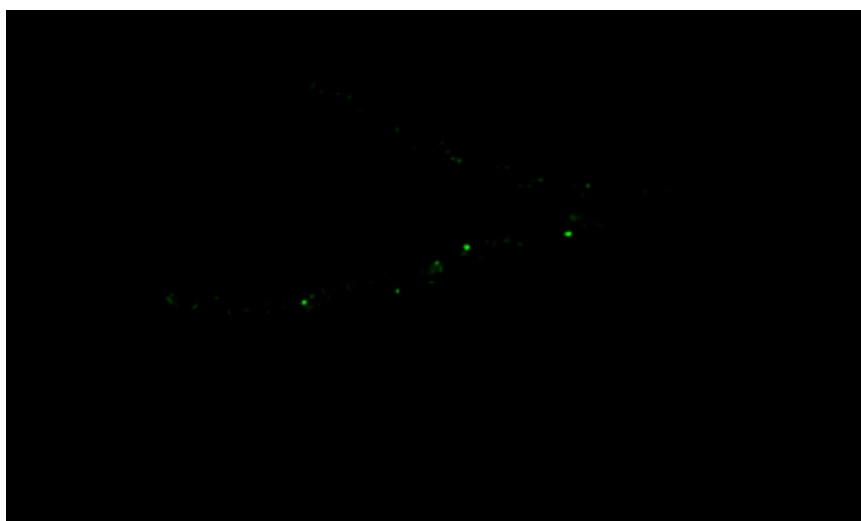

**Movie S1.** The dynamics of BsFlhG-YFP in *B. subtilis* were followed over 30 s. Images were acquired every 3.24 s and are displayed with a frame rate of three frames/s.

[Movie S1](#)

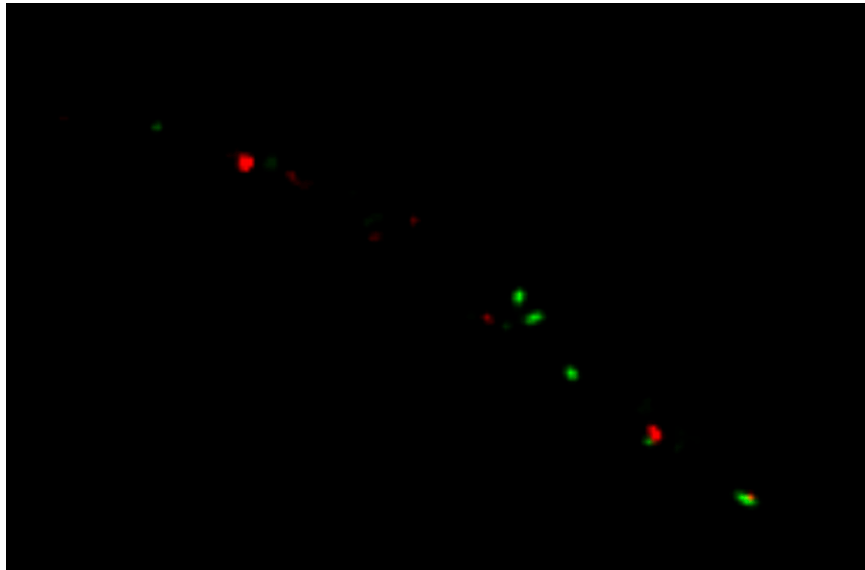

**Movie S2.** Time-resolved colocalization of *BsFliM*-CFP and *BsFlhG*-YFP in *B. subtilis* was monitored by time-lapse fluorescence microscopy over 5 min. We did not observe that stationary FlhG precedes FliM puncta. However, we hardly observed the occurrence of new FliM puncta and therefore can draw no conclusions from this experiment. Images were taken every 10.48 s and are displayed with a frame rate of three frames/s.

[Movie S2](#)

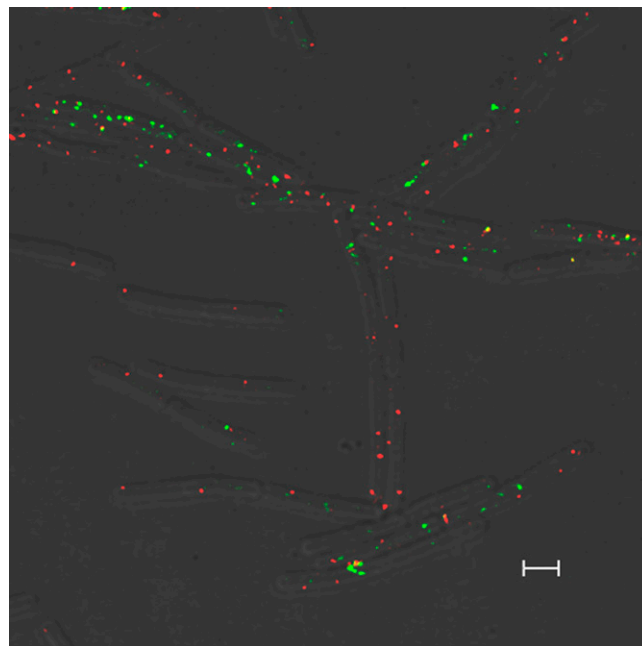

**Movie S3.** Time-resolved colocalization of *BsFliM*-CFP and *BsFlhG*-YFP in *B. subtilis* was monitored by time-lapse fluorescence microscopy over 6.5 min. Images were acquired every 20.33 s and are displayed with a frame rate of three frames/s.

[Movie S3](#)
